# Supplementary material
Source: PubMed Central journal article supplement (PMC7205439)
Supplement: jciinsight-5-136907-s107.pdf [file jciinsight-5-136907-s107.pdf]

## Supplemental Figures

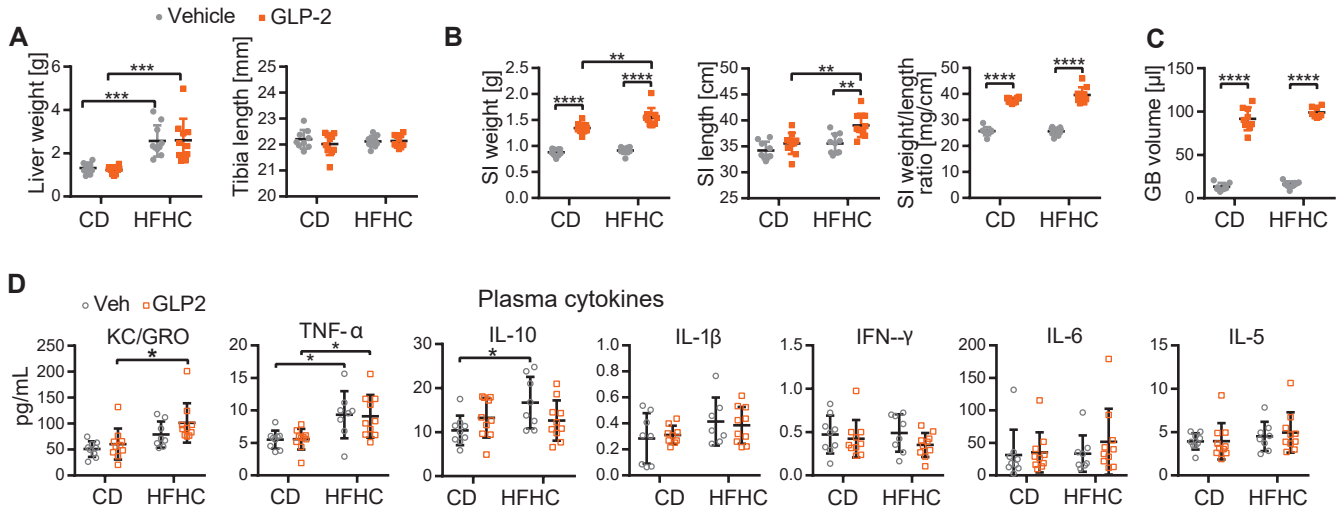

### Supplemental Figure S1 Endpoints in mice on HFHC or CD diet treated with GLP-2 or vehicle.

(A) Liver weight (left) and tibia length (right). Tibia length was used for normalization of all measures reported in panels S1A and S1B. (B) Indicators of GLP-2 treatment efficacy: small intestine (SI) weight, length and weight/length ratio. (C) Gallbladder (GB) volume determined by image analysis of GBs that were ligated and resected at termination. (D) Concentrations of inflammatory cytokines in plasma. For (A-D), mice were treated daily with GLP-2 or vehicle for 11 days, with the last dose administered one hour prior to termination,  $n=9-10$  per group. for all panels. Data are presented as the means  $\pm$  SD. \* $p<0.05$ , \*\* $p<0.01$ , \*\*\* $p<0.001$ , \*\*\*\* $p<0.0001$  using two-way ANOVA with Tukey correction for multiple comparisons.

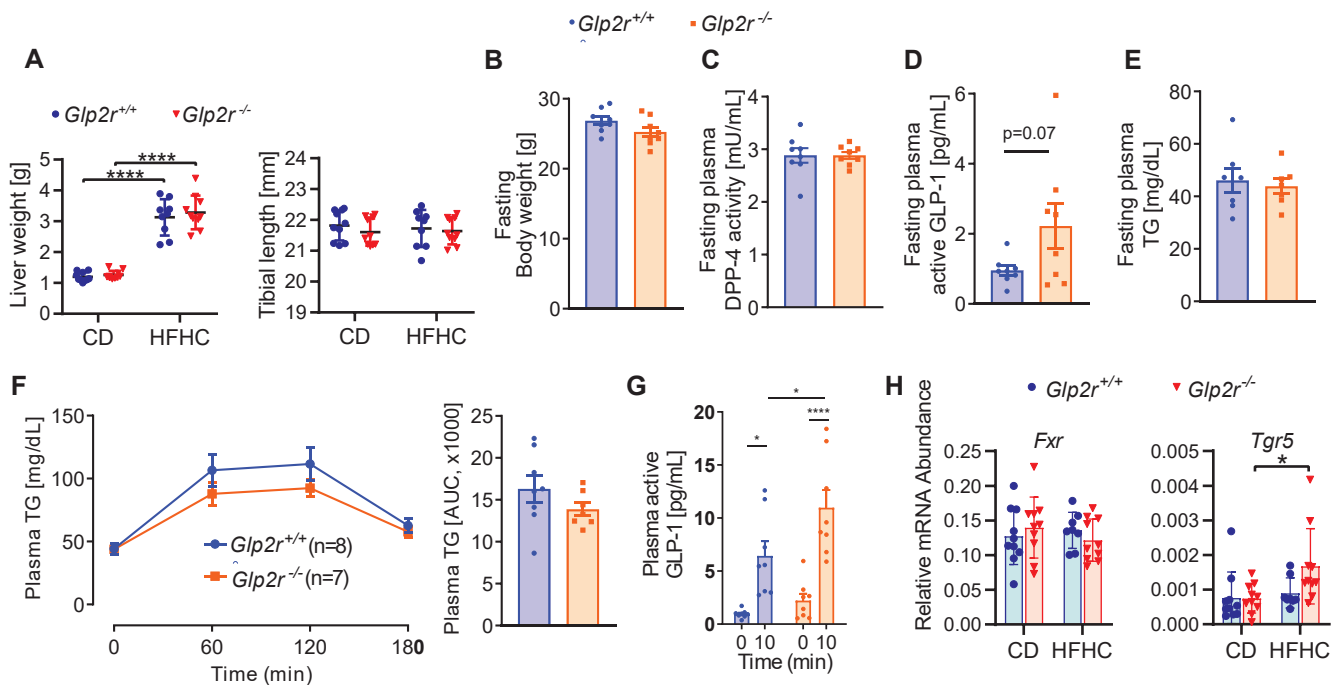

### Supplemental Figure S2 Metabolic phenotypes in CD- vs. HFHC-fed mice.

(A) Liver weight (left) normalized to tibia length (right). (B) Body weight. (C) Fasting plasma DPP-4 activity. (D) Fasting plasma active GLP-1 levels. (E) Fasting plasma triglyceride (TG) levels. (F) Plasma TG levels during an oral lipid tolerance test (LTT) and area under curve (AUC) data. (G) Plasma active GLP-1 levels at time 0, and 10min of the LTT in F. Data in (A-G) are from 8-12 week old *Glp2r<sup>+/+</sup>* and *Glp2r<sup>-/-</sup>* mice maintained on a RC diet (n=8/group) that were fasted for 5-6 hours prior to analyses. (H) Hepatic mRNA abundance, relative to *Ppia*, of the bile acid sensing receptors *Fxr* and *Tgr5* in *Glp2r<sup>+/+</sup>* and *Glp2r<sup>-/-</sup>* mice fed either CD or HFHC diet (n=9-10/group) as described in Figure 3A. Data are presented as the means  $\pm$  SD. \*p<0.05, \*\*\*\*p<0.0001 using two-way ANOVA with Tukey correction for multiple comparisons (panels A,H) or Student's t-test (panels B-G).

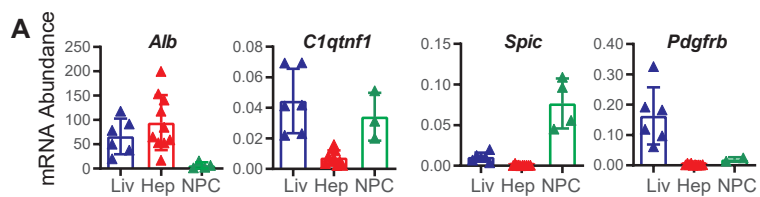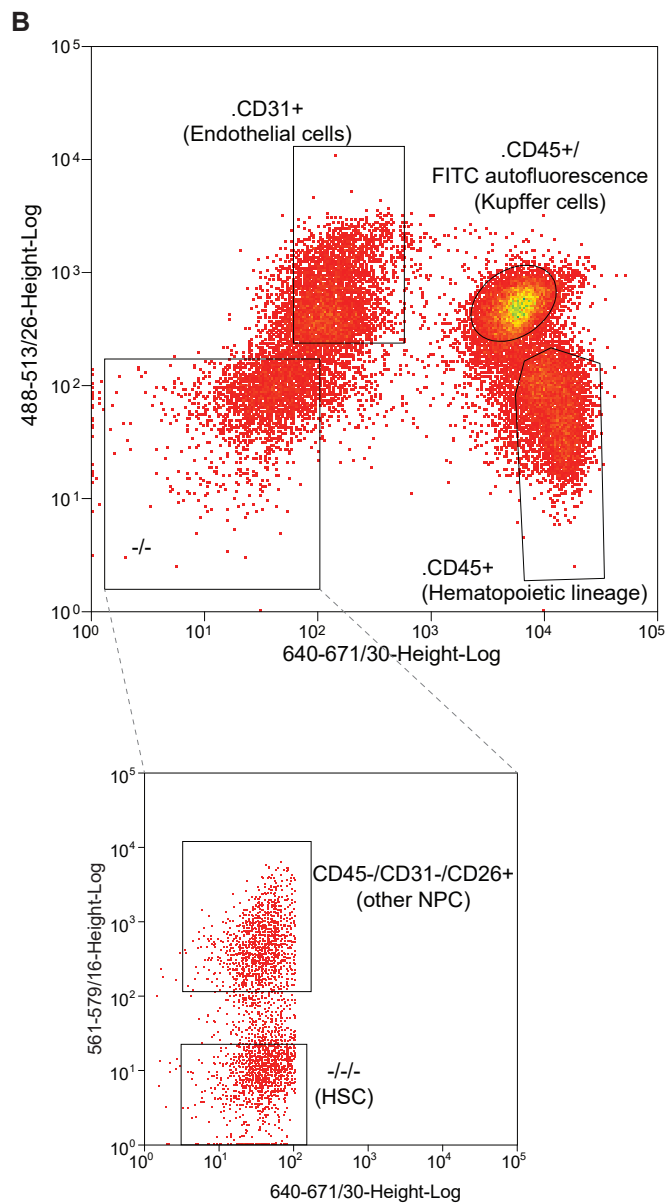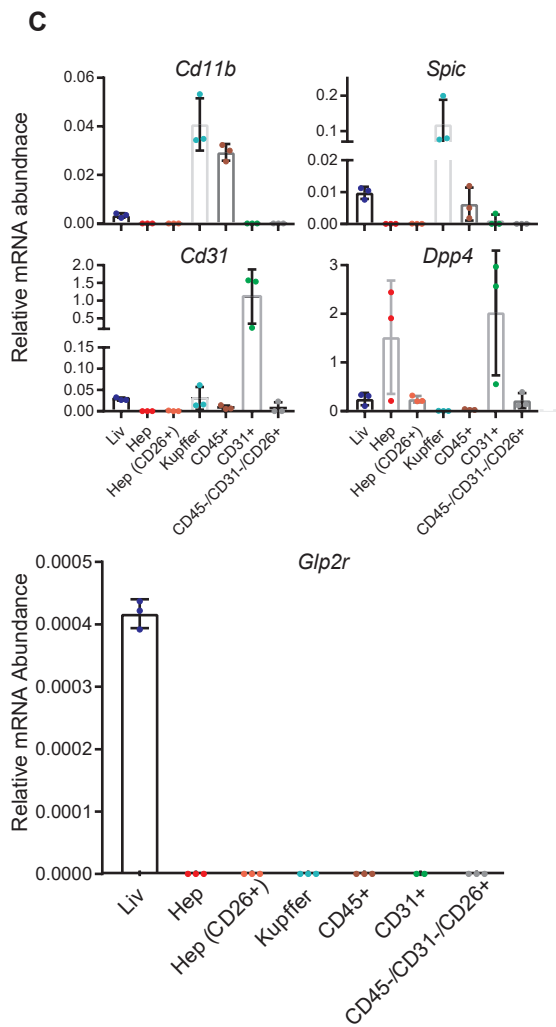

Supplemental Figure S3

**Supplemental Figure S3 Fractionation of hepatocytes and non-parenchymal cells (NPC) from whole liver.**

(A) mRNA expression of cell type-specific markers in whole liver (Liv, n=6), hepatocyte (Hep, n=10), and non-hepatocyte (NPC, n=4) fractions from male wild-type C57BL/6 mice 8-14 weeks old (n=3 for all panels). (B) Representative scatter plots of NPC fractions from 3 wild-type C57BL/6 male mice, FACS sorted by surface markers enriched for specific subpopulations. Top: CD31<sup>+</sup> (endothelial cells); KC CD45<sup>+</sup> (hematopoietic lineage cells with autofluorescence in the FITC range, corresponding to Kupffer cells (KC)); CD 45<sup>+</sup> (all other hematopoietic lineage cells); -/- (CD31<sup>-</sup>/CD45<sup>-</sup> cells). Bottom: CD31<sup>-</sup>/CD45<sup>-</sup> were further sorted to CD26<sup>+</sup> and CD26<sup>-</sup> fractions. CD26, also known as dipeptidyl peptidase-4 (DPP4), is expressed in most NPC and absent in HSCs. (C) mRNA abundance of cell-type-specific markers (top panels) and *Glp2r* (bottom panel) in Liv, whole liver; Hep, hepatocytes; Hep CD26<sup>+</sup>, hepatocytes further purified by sorting to include CD26<sup>+</sup> cells; Kupffer, CD45<sup>+</sup> gated Kupffer cells from 3 wild-type C57BL/6 male mice. CD31<sup>-</sup>/CD45<sup>-</sup>/CD26<sup>-</sup> fraction corresponding to hepatic stellate cells (HSC) yielded too few cells for mRNA analysis and is not represented. *Cd11b*, hematopoietic marker enriched in both CD45<sup>+</sup> and Kupffer gates; *Spic*, Kupffer cell marker; *Cd31*, endothelial marker; *Dpp4*, enriched in hepatocytes and endothelial cells.



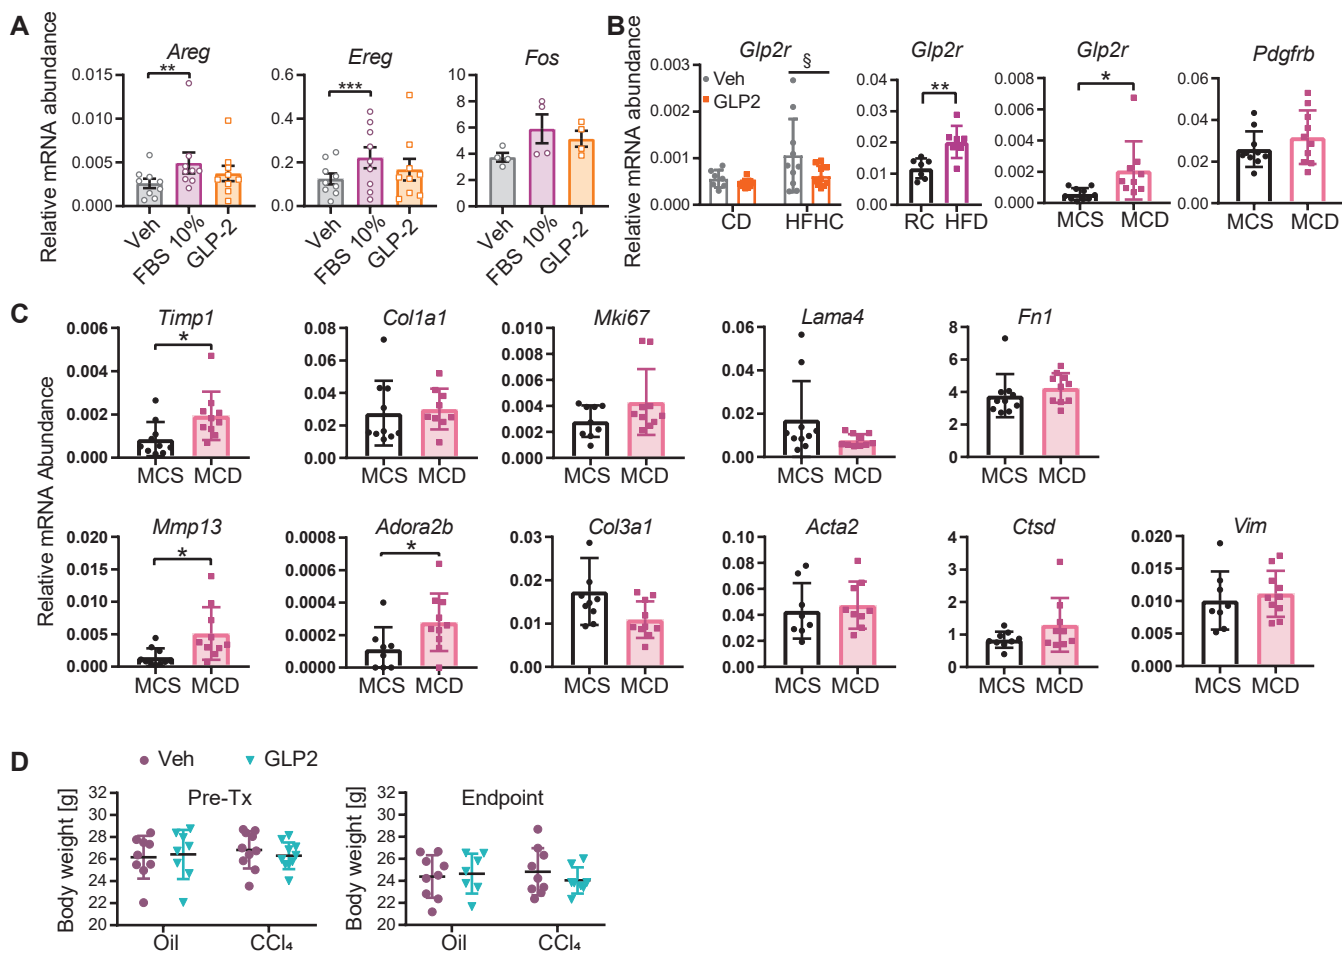

### Supplemental Figure S4

(A) mRNA abundance, relative to *Ppia*, of immediate early genes (IEGs) used as markers of GLP-2 action in isolated hepatic stellate cells (HSC, isolated as described in Figures 5C and S3B). As described in Figure 5H, HSC were purified from 18 C57BL/6 WT mice 4-6 months old. Cells, combined from 1-4 mice per data point were incubated for 20min with either 10% fetal bovine serum (FBS), GLP-2 (50nM), or saline (Veh). Data are presented as the means  $\pm$  SEM. \* $p$ <0.05, \*\* $p$ <0.01 using ratio-paired t-test. (B) *Glp2r* mRNA expression, relative to *Ppia*, in liver from mice exposed to various diets. From left to right: seventeen weeks of CD or HFHC diet as per Figure 1A ( $n$ =9-10/group), 12 weeks of regular chow (RC) or HFD ( $n$ =7/group), *Glp2r* and *Pdgfrb* (stellate cell marker) expression after 2 weeks of methionine choline sufficient (MCS) or deficient (MCD) diet, bottom panels, ( $n$ =9-10/group). Data are presented as the means  $\pm$  SD. \* $p$ <0.05, \*\* $p$ <0.01, \*\*\* $p$ <0.001, \*\*\*\* $p$ <0.0001 using two-way ANOVA with Tukey correction for multiple comparisons or Student's t-test where appropriate. (C) mRNA abundance, normalized to *Ppia*, of HSC activation markers in whole liver. Wild-type mice ( $n$ =10/diet) were fed a methionine-choline deficient (MCD) or sufficient (MCS) diet for 2 weeks. Data are presented as the means  $\pm$  SD. \* $p$ <0.05 by Student's t-test. (D) Body weights before (Pre-Tx) and at termination (Endpoint) in vehicle (Veh) or GLP-2 treated wild-type mice that received CCl<sub>4</sub> or control (Oil) treatment ( $n$ =8-11/group), as described in Figure 7A.

## Supplemental Materials and methods

| Reagent or resource                                        | Source                     | Identifier  |
|------------------------------------------------------------|----------------------------|-------------|
| <b><u>Chemicals, peptides and recombinant proteins</u></b> |                            |             |
| Hepatocyte Wash medium                                     | ThermoFisher               | 17704024    |
| Liver Perfusion Medium                                     | ThermoFisher               | 17701038    |
| Liver Digest Medium                                        | ThermoFisher               | 17703034    |
| DNase I grade II                                           | Sigma-Aldrich              | 10104159001 |
| Pronase                                                    | Sigma-Aldrich              | P5147       |
| Collagenase D                                              | Sigma-Aldrich (Roche)      | 11088866001 |
| Tissue-Tek O.C.T compound                                  | Sakura                     | 4583        |
| Mineral oil                                                | Sigma-Aldrich              | M1180       |
| Olive oil                                                  | Sigma-Aldrich              | O1514       |
| Carbon tetrachloride                                       | Toronto research chemicals | C176905     |
| Nycodenz AG                                                | Alere technologies         | 1002424     |
| 7-AAD                                                      | BD Pharmingen              | 559925      |
| DMEM 4.5g/L glucose                                        | Wisent Bioproducts         | 319-005-CL  |
| Fetal Bovine Serum                                         | Wisenet Bioproducts        | 080-150     |
| Bovine Serum Albumin (BSA)                                 | Sigma-Aldrich              | A7030       |
| Charcoal Dextran                                           | Sigma-Aldrich              | C6241       |
| PE anti-mouse CD26 (DPP-4) Ab                              | Biologend                  | 137804      |
| APC anti-mouse CD45.2 Ab                                   | Biologend                  | 109814      |
| FITC anti-mouse CD31 Ab                                    | Biologend                  | 102406      |
| Teduglutide                                                | Shire Pharmaceutical inc.  | 7001450     |

### Critical commercial assays

**Mouse Proinflammatory Panel** Mesoscale MSD V-PLEX K15048G

#### assay kit

**Active GLP-1 (ver. 2) kit** Mesoscale K150JWC-2

**Triglyceride assay kit** Roche Diagnostics 11877771 216

(for plasma TG relating to Figure S2F)

**Triglyceride calibrator** Wako 464-01601

(for plasma TG relating to Figure S2F)

**H-Gly-Pro-AMC HBr** Bachem I-1225

(for DPP-4 activity assay)

**AMC (for DPP-4 activity assay)** Bachem Q-1025

**Protein assay kit II** Biorad 5000002

**Triglyceride determination kit** COBAS **7193130**

(For liver TG content)

**Triglyceride calibrator** COBAS 10759350

(For liver TG content)

**Cholesterol E kit** Wako Diagnostics 999-02601

(For liver cholesterol content)

### Experimental models: organisms, strains

**C57BL/6J WT mice** Jackson Laboratories 000664

***Glp2r* Null** In-house colony at the Toronto Centre for Phenogenomics Lee, SJ Endocrinology 2012 PMID 2225342

## Diets

|                                                 |                        |             |
|-------------------------------------------------|------------------------|-------------|
| <b>Regular Chow diet (RC)</b>                   | Harlan Teklad (Envigo) | 2018        |
| <b>10% fat control diet</b>                     | Research Diets         | D09100304   |
| <b>45% high fat diet</b>                        | Research Diets         | D12451i     |
| <b>60% high fat diet</b>                        | Research Diets         | D12492      |
| <b>HFHC diet</b>                                | Research Diets         | D09100301   |
| <b>Methionine-Choline deficient diet (MCD)</b>  | Cedarlane              | A02082002Bi |
| <b>Methionine-Choline sufficient diet (MCS)</b> | Cedarlane              | A02082003Bi |

## Software and algorithms

|                                           |                         |                                                                                                                                     |
|-------------------------------------------|-------------------------|-------------------------------------------------------------------------------------------------------------------------------------|
| <b>GraphPad Prism, versions 7, 8.3</b>    | GraphPad Prism software | <a href="https://www.graphpad.com">https://www.graphpad.com</a> ;<br>RRID:SCR_002798                                                |
| <b>ImageJ</b>                             | NIH                     | 1.52A                                                                                                                               |
| <b>OlyVIA 2.9</b>                         | OLYMPUS (Build 13735)   | <a href="http://www.olympus-sis.com">www.olympus-sis.com</a>                                                                        |
| <b>Aperio ImageScope<br/>v12.3.2.8013</b> | Leica Biosystems        | <a href="https://aperio-imagescope.software.informer.com/12.3/">https://aperio-<br/>imagescope.software.informer.<br/>com/12.3/</a> |

## Others

|                              |           |        |
|------------------------------|-----------|--------|
| <b>Human Liver total RNA</b> | Life Tech | AM7960 |
| <b>Human Liver total RNA</b> | Agillient | 540017 |
| <b>Human Liver RNA</b>       | Clontech  | 636531 |
| <b>Oligonucleotides</b>      |           |        |

|                                                                             |                   |               |
|-----------------------------------------------------------------------------|-------------------|---------------|
| <b>acetyl-Coenzyme A dehydrogenase, medium chain. (<i>Acadm</i>)</b>        | Thermo Scientific | Mm00431611_m1 |
| <b>acyl-CoA synthetase long-chain family member 1 (<i>Acs1</i>)</b>         | Thermo Scientific | Mm00484217_m1 |
| <b>actin, beta (<i>Actb</i>)</b>                                            | Thermo Scientific | Mm00607939_s1 |
| <b>adenosine A2b receptor (<i>Adora2b</i>)</b>                              | Thermo Scientific | Mm00839292_m1 |
| <b>apolipoprotien A5 (<i>Apoa5</i>)</b>                                     | Thermo Scientific | Mm00475480_m1 |
| <b>apolipoprotein B (<i>ApoB</i>)</b>                                       | Thermo Scientific | Mm01545159_m1 |
| <b>apolipoprotien C3 (<i>Apoc3</i>)</b>                                     | Thermo Scientific | Mm00445670_m1 |
| <b>apolipoprotein E (<i>ApoE</i>)</b>                                       | Thermo Scientific | Mm00437573_m1 |
| <b>amphiregulin (<i>Areg</i>)</b>                                           | Thermo Scientific | Mm00437583_m1 |
| <b>bone morphogenetic protein 4 (<i>Bmp4</i>)</b>                           | Thermo Scientific | Mm00432087_m1 |
| <b>c1q and tumor necrosis factor related protein 1 (<i>C1qtnf1</i>)</b>     | Thermo Scientific | Mm00480204_m1 |
| <b>chemokine (C-C motif) ligand 2 (<i>Ccl2</i>)</b>                         | Thermo Scientific | Mm00441242_m1 |
| <b>CD14 antigen (<i>Cd14</i>)</b>                                           | Thermo Scientific | Mm00438094_g1 |
| <b>platelet/endothelial cell adhesion molecule 1 (<i>Pecam1</i>) (CD31)</b> | Thermo Scientific | Mm01242584_m1 |
| <b>CD36 antigen (<i>Cd36</i>)</b>                                           | Thermo Scientific | Mm00432403_m1 |
| <b>CD68 antigen (<i>Cd68</i>)</b>                                           | Thermo Scientific | Mm00839636_g1 |
| <b>collagen, type I, alpha 1(<i>Col1a1</i>)</b>                             | Thermo Scientific | Mm00801666_g1 |
| <b>collagen, type III, alpha 1(<i>Col3a1</i>)</b>                           | Thermo Scientific | Mm01254476_m1 |
| <b>collagen, type VIII, alpha</b>                                           | Thermo Scientific | Mm01344184_m1 |

**1(*Col8a1*)**

**carnitine palmitoyltransferase 1a,  
liver (*Cpt1a*)**

Thermo Scientific

Mm01231183\_m1

**carnitine palmitoyltransferase 2  
(*Cpt2*)**

Thermo Scientific

Mm00487205\_m1

**C-reactive protein, pentraxin-  
related (*Crp*)**

Thermo Scientific

Mm00432680\_g1

**cathepsin D (*Ctsd*)**

Thermo Scientific

Mm00515586\_m1

**chemokine (C-X-C motif) ligand 1  
(*Cxcl1*)**

Thermo Scientific

Mm00433859\_m1

**chemokine (C-X-C motif) ligand 12  
(*Cxcl12*)**

Thermo Scientific

Mm00445553\_m1

**chemokine (C-X-C motif) receptor  
2 (*Cxcr2*) (IL8Rb)**

Thermo Scientific

Mm00438258\_m1

**cytochrome P450, family 7,  
subfamily a, polypeptide 1  
(*Cyp7a1*)**

Thermo Scientific

Mm00484152\_m1

**diacylglycerol O-acyltransferase 1  
(*Dgat1*)**

Thermo Scientific

Mm00515643\_m1

**dipeptidyl peptidase4 (*Dpp4*)**

Thermo Scientific

Mm00494538\_m1

**early growth response 1 (*Egr1*)**

Thermo Scientific

Mm00656724\_m1

**elastase, neutrophil expressed  
(*Elane*)**

Thermo Scientific

Mm00469310\_m1

**epiregulin (*Ereg*)**

Thermo Scientific

Mm00514794\_m1

**fatty acid synthase (*Fasn*)**

Thermo Scientific

Mm00662319\_m1

**fibronectin 1 (*)***

Thermo Scientific

Mm01256744\_m1

**FBJ osteosarcoma oncogene (*Fos*)**

Thermo Scientific

Mm00487425\_m1

**nuclear receptor subfamily 1,  
group H, member 4 (BAR) (*FXR*)**

Thermo Scientific

Mm01240553\_m1

**(Nr1h4)**

|                                                                                                                                                                           |                   |               |
|---------------------------------------------------------------------------------------------------------------------------------------------------------------------------|-------------------|---------------|
| <b>glucagon-like peptide 2 receptor<br/>(Glp2r) Mm01329475_m1</b>                                                                                                         | Thermo Scientific | Mm01329475_m1 |
| <b>glycerol-3-phosphate<br/>acyltransferase, mitochondrial.<br/>(Gpam)</b>                                                                                                | Thermo Scientific | Mm00833328_m1 |
| <b>glutathione S-transferase, mu 3<br/>(Gstm3)</b>                                                                                                                        | Thermo Scientific | Mm00833923_m1 |
| <b>hydroxyacyl-Coenzyme A<br/>dehydrogenase/3-ketoacyl-<br/>Coenzyme A thiolase/enoyl-<br/>Coenzyme A hydratase<br/>(trifunctional protein), beta<br/>subunit (Hadhb)</b> | Thermo Scientific | Mm00523880_m1 |
| <b>3-hydroxy-3-methylglutaryl-<br/>Coenzyme A reductase (Hmgcr)</b>                                                                                                       | Thermo Scientific | Mm01282499_m1 |
| <b>interferon gamma (Ifng)</b>                                                                                                                                            | Thermo Scientific | Mm01168134_m1 |
| <b>interleukin 10 (Il10)</b>                                                                                                                                              | Thermo Scientific | Mm99999062_m1 |
| <b>interleukin 18 (Il18)</b>                                                                                                                                              | Thermo Scientific | Mm00434226_m1 |
| <b>interleukin 1 beta (Il1b)</b>                                                                                                                                          | Thermo Scientific | Mm01336189_m1 |
| <b>interleukin 23, alpha subunit p19<br/>(Il23a)</b>                                                                                                                      | Thermo Scientific | Mm01160011_g1 |
| <b>interleukin 6 (Il6)</b>                                                                                                                                                | Thermo Scientific | Mm00446190_m1 |
| <b>interleukin 6 receptor, alpha<br/>(Il6ra)</b>                                                                                                                          | Thermo Scientific | Mm00439653_m1 |
| <b>laminin, alpha 4 (Lama4)</b>                                                                                                                                           | Thermo Scientific | Mm01193660_m1 |
| <b>lecithin cholesterol<br/>acyltransferase (Lcat)</b>                                                                                                                    | Thermo Scientific | Mm01247340_m1 |
| <b>low density lipoprotein receptor</b>                                                                                                                                   | Thermo Scientific | Mm00440169_m1 |

**(Ldlr)**

|                                                                                               |                   |               |
|-----------------------------------------------------------------------------------------------|-------------------|---------------|
| <b>lipase, hepatic (<i>Lipc</i>)</b>                                                          | Thermo Scientific | Mm00433975_m1 |
| <b>lysyl oxidase (<i>Lox</i>)</b>                                                             | Thermo Scientific | Mm00495386_m1 |
| <b>lipoprotein lipase (<i>Lpl</i>)</b>                                                        | Thermo Scientific | Mm00434770_m1 |
| <b>macrophage receptor with<br/>collagenous structure (<i>Marco</i>)</b>                      | Thermo Scientific | Mm00440265_m1 |
| <b>antigen identified by monoclonal<br/>antibody Ki 67 (<i>Mki67</i>)</b>                     | Thermo Scientific | Mm01278617_m1 |
| <b>matrix metalloproteinase 13<br/>(<i>Mmp13</i>)</b>                                         | Thermo Scientific | Mm00439491_m1 |
| <b>MX dynamin-like GTPase 1 (<i>Mx1</i>)</b>                                                  | Thermo Scientific | Mm00487796_m1 |
| <b>nuclear receptor subfamily 4,<br/>group A, member 1 (<i>Nr4a1</i>)</b>                     | Thermo Scientific | Mm01300401_m1 |
| <b>2'-5' oligoadenylate synthetase 2<br/>(<i>Oas2</i>)</b>                                    | Thermo Scientific | Mm00460961_m1 |
| <b>platelet derived growth factor<br/>receptor, beta polypeptide<br/>(<i>Pdgfrb</i>)</b>      | Thermo Scientific | Mm00435546_m1 |
| <b>pleckstrin homology-like domain,<br/>family A, member 1 (<i>Plkla1</i>)</b>                | Thermo Scientific | Mm00456345_g1 |
| <b>eukaryotic translation initiation<br/>factor 2-alpha kinase 2 PKR<br/>(<i>Eif2ak2</i>)</b> | Thermo Scientific | Mm01235643_m1 |
| <b>patatin-like phospholipase<br/>domain containing 3 (<i>Pnpla3</i>)</b>                     | Thermo Scientific | Mm00504420_m1 |
| <b>peroxisome proliferator activator<br/>receptor gamma (<i>Pparg</i>)</b>                    | Thermo Scientific | Mm01184322_m1 |
| <b>Cyclophilin (<i>Ppia</i>)</b>                                                              | Thermo Scientific | Mm02342430_g1 |
| <b>protein tyrosine phosphatase,</b>                                                          | Thermo Scientific | Mm01293577_m1 |



|                                                                                                |                   |               |
|------------------------------------------------------------------------------------------------|-------------------|---------------|
| <b>receptor type, C (<i>Ptprc</i>) (CD45)</b>                                                  |                   |               |
| <b>RAS, dexamethasone-induced 1 (<i>Rasd1</i>)</b>                                             | Thermo Scientific | Mm00842185_g1 |
| <b>stearoyl-Coenzyme A desaturase 1 (<i>Scd1</i>)</b>                                          | Thermo Scientific | Mm00772290_m1 |
| <b>superoxide dismutase 2, mitochondrial (<i>Sod2</i>)</b>                                     | Thermo Scientific | Mm00449726_m1 |
| <b>Spi-C transcription factor (<i>Spic</i>)</b>                                                | Thermo Scientific | Mm00488428_m1 |
| <b>sterol regulatory element binding transcription factor 1 (<i>Srebp1c</i>, <i>Sreb1</i>)</b> | Thermo Scientific | Mm00550338_m1 |
| <b>G protein-coupled bile acid receptor 1 (<i>Tgr5</i>) (GPBAR1)*</b>                          | Thermo Scientific | Mm04212121_s1 |
| <b>tissue inhibitor of metalloproteinase 1 (<i>Timp1</i>)</b>                                  | Thermo Scientific | Mm00441818_m1 |
| <b>toll-like receptor4 (<i>Tlr4</i>)</b>                                                       | Thermo Scientific | Mm00445273_m1 |
| <b>toll-like receptor8 (<i>Tlr8</i>)</b>                                                       | Thermo Scientific | Mm04209873_m1 |
| <b>Tumor necrosis factor alpha (<i>Tnfa</i>)</b>                                               | Thermo Scientific | Mm00443258_m1 |
| <b>ubiquitin specific peptidase 18 (<i>Usp18</i>)</b>                                          | Thermo Scientific | Mm01188805_m1 |
| <b>vimentin (<i>Vim</i>)</b>                                                                   | Thermo Scientific | Mm01333430_m1 |
| <b>very low density lipoprotein receptor (<i>Vldlr</i>)</b>                                    | Thermo Scientific | Mm00443298_m1 |
| <b>X-box binding protein 1 (<i>Xbp1</i>)</b>                                                   | Thermo Scientific | Mm00457357_m1 |

## CONTACT FOR REAGENT AND RESOURCE SHARING

Further information and requests for resources and reagents should be directed to the Lead Contact, Dr. Daniel J. Drucker ([drucker@lunenfeld.ca](mailto:drucker@lunenfeld.ca)).
